# Supplementary material for: Evaluating the impact of laboratory-based eligibility criteria by race/ethnicity in first-line clinical trials of DLBCL
Source: PubMed Central journal article supplement — Blood Adv. 2024 Jul 14;8(16):4414–22. doi: 10.1182/bloodadvances.2024012838 (PMC11375257; doi:10.1182/bloodadvances.2024012838), 2024-07-14
Supplement: BLOODA_ADV-2024-012838-mmc1.pdf [file BLOODA_ADV-2024-012838-mmc1.pdf]

## Supplementary Figures

### Figure S1: Creatinine Clearance by Race-Ethnicity

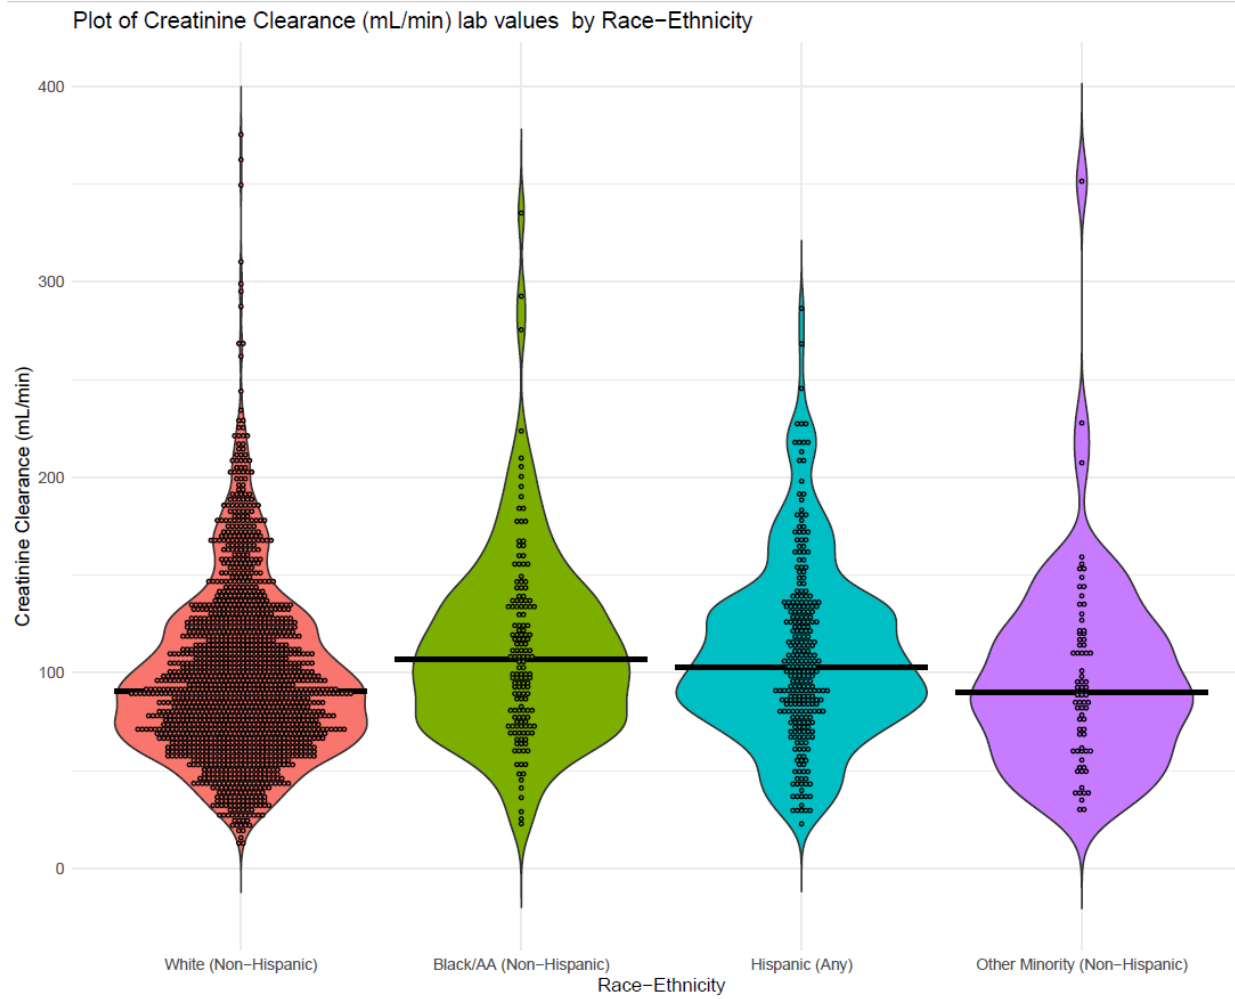

**Figure S2: Platelet Counts by Race-Ethnicity**

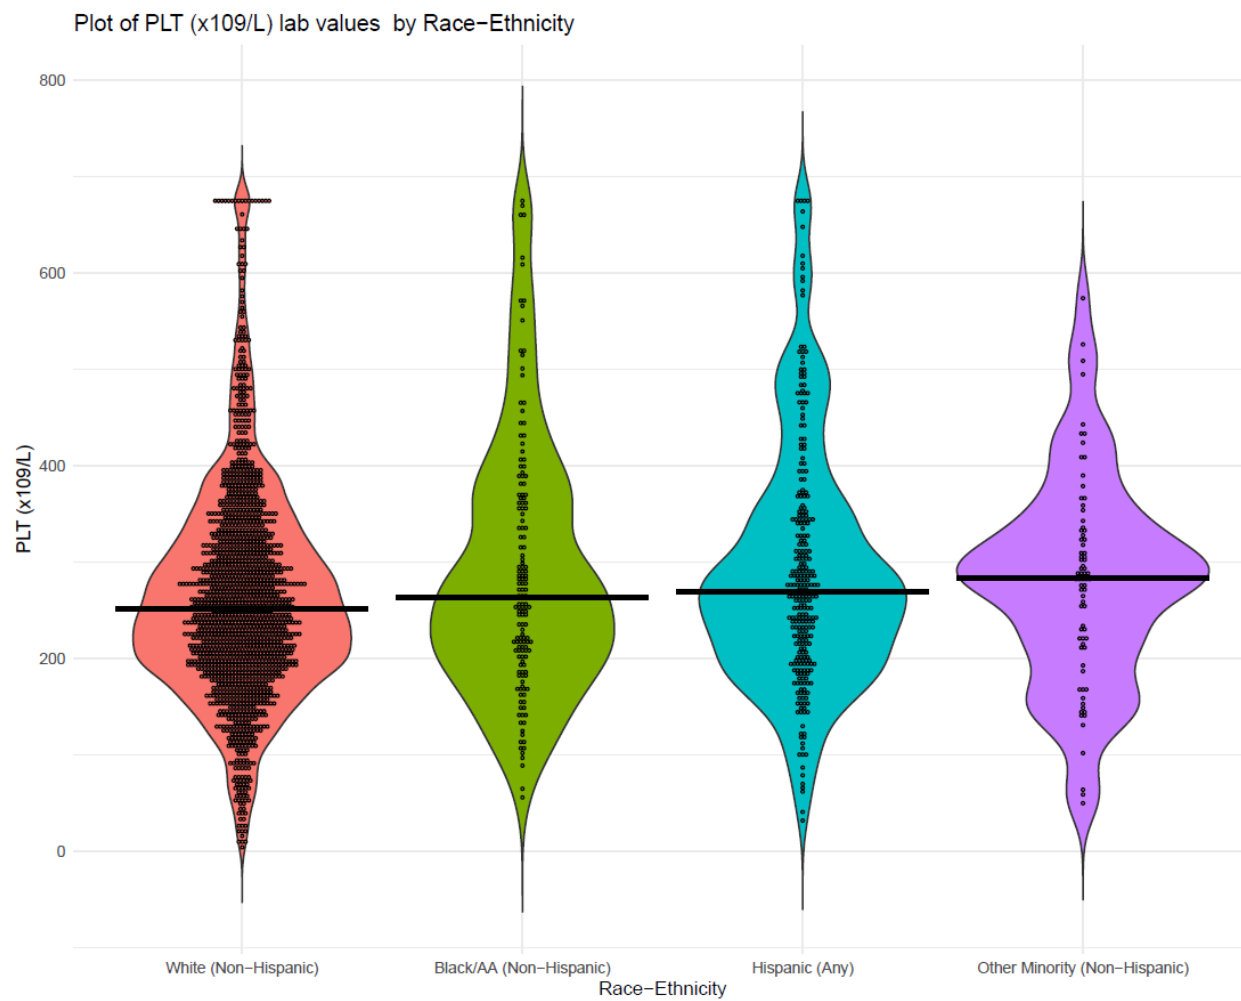

**Figure S3: Bilirubin by Race-Ethnicity**

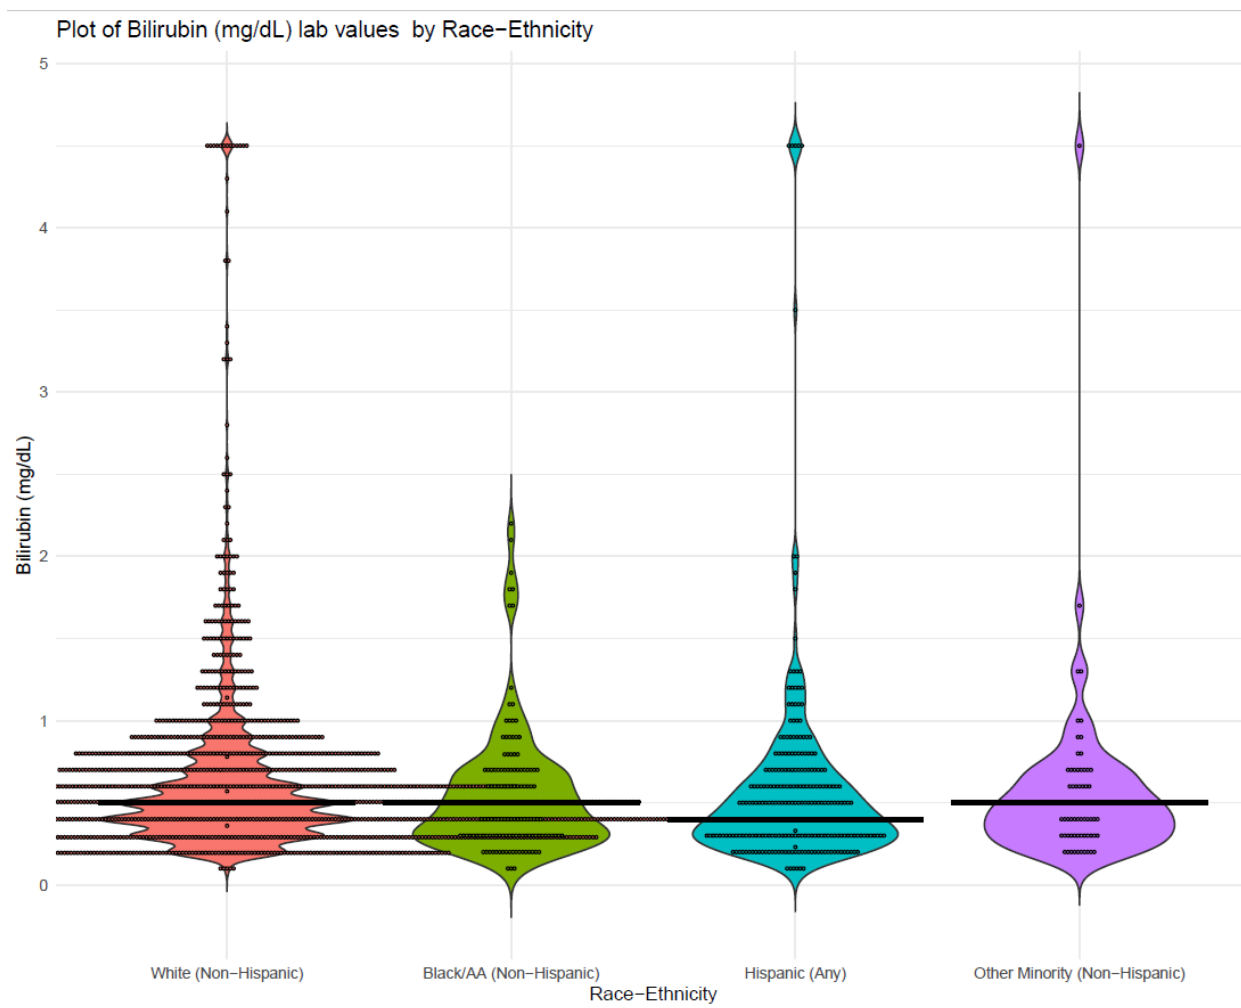

**Figure S4: Event-free survival in LEO Cohort by POLARIX Eligibility**

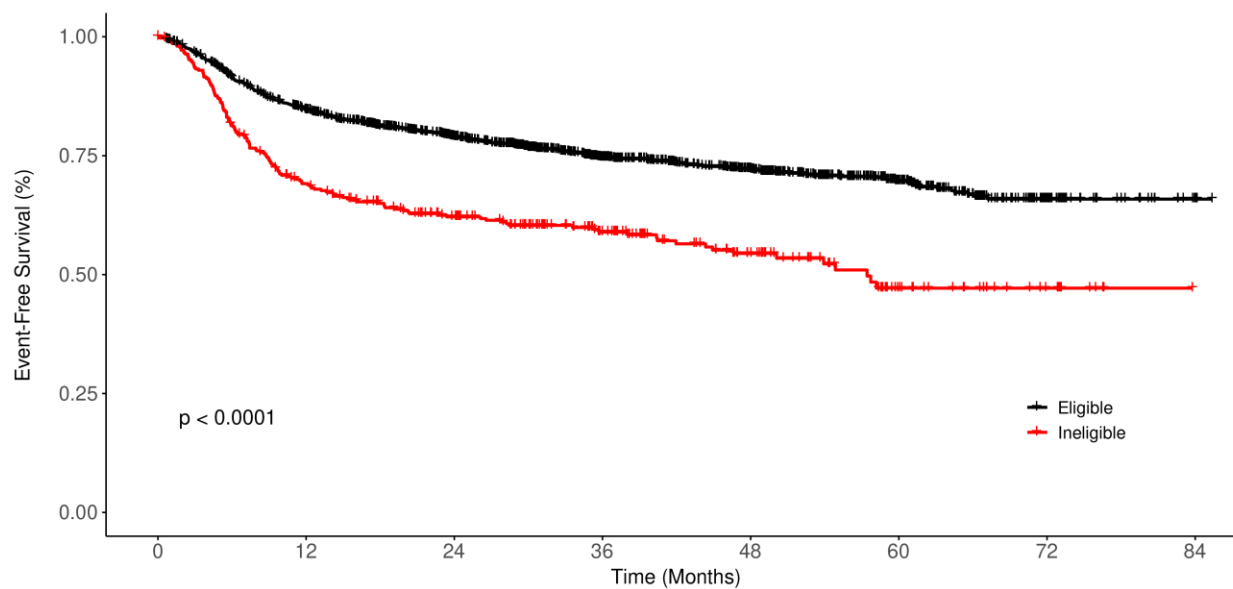

Number at risk

|            |      |      |      |     |     |     |    |   |
|------------|------|------|------|-----|-----|-----|----|---|
| Eligible   | 1825 | 1463 | 1191 | 760 | 513 | 259 | 56 | 4 |
| Ineligible | 360  | 237  | 184  | 117 | 64  | 27  | 9  | 0 |

Cumulative number of events

|            |   |     |     |     |     |     |     |     |
|------------|---|-----|-----|-----|-----|-----|-----|-----|
| Eligible   | 0 | 274 | 366 | 422 | 443 | 457 | 467 | 467 |
| Ineligible | 0 | 109 | 132 | 140 | 147 | 153 | 153 | 153 |

**Figure S5: Cause of Death in LEO Cohort by POLARIX Eligibility**

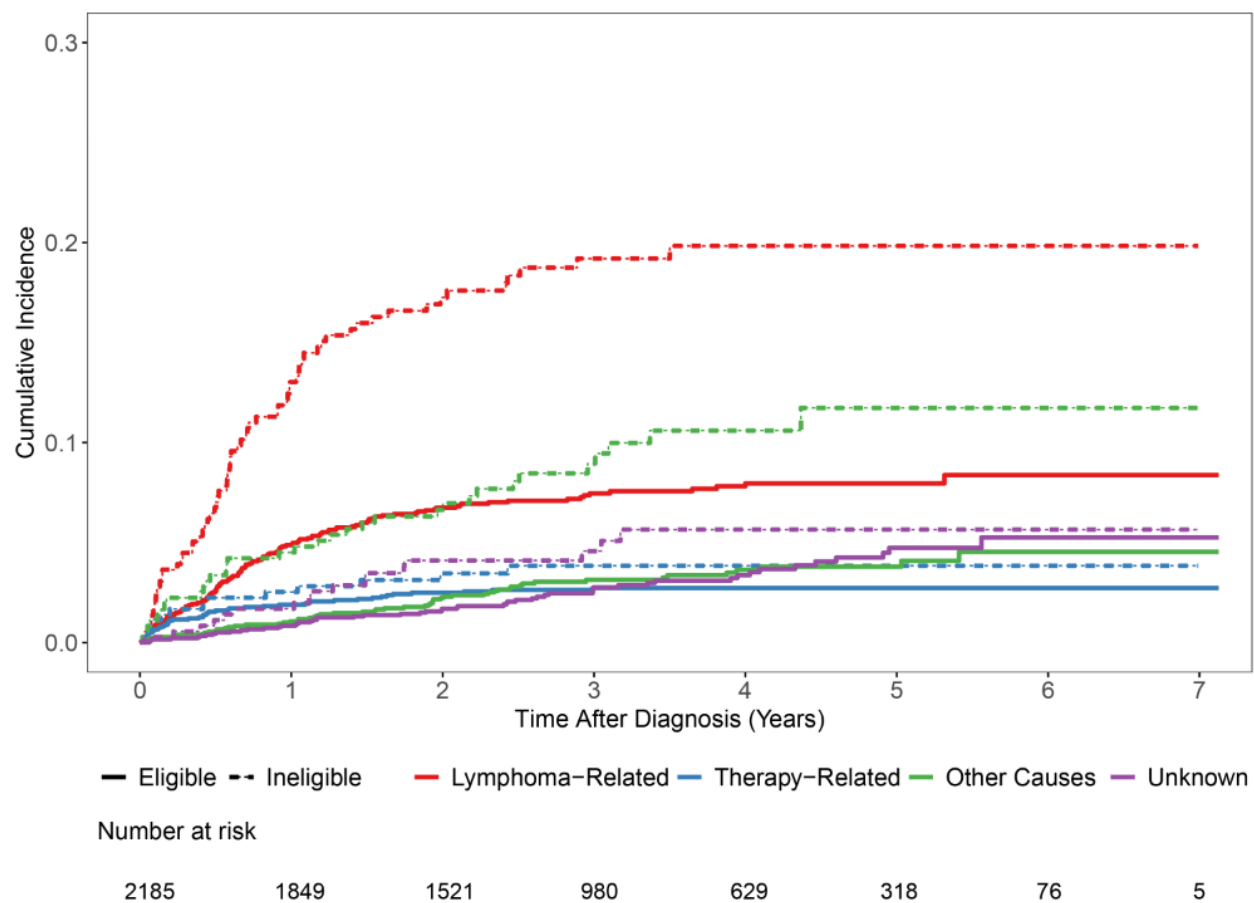

**Table S1: Lab-based Eligibility Criteria from Recent Clinical Trials**

| PARAMETER                            | PHOENIX                          | ROBUST                                                                                | ECOG1412                                                                            | REMoDL-B                             | GOYA        | ENGINE      | CALGB 50303   | POLARIX              |
|--------------------------------------|----------------------------------|---------------------------------------------------------------------------------------|-------------------------------------------------------------------------------------|--------------------------------------|-------------|-------------|---------------|----------------------|
| ANC (x 10 <sup>9</sup> /L)           | >1000                            | >1500 (>1000 for BM inv)                                                              | >= 1500                                                                             | >1000 (lower unless due to lymphoma) | >1500       | > 1500      | >1000         | >1000, unless BM inv |
| Platelets (x 10 <sup>9</sup> /L)     | >75, unless BM inv               | >75 (>50 for BM inv)                                                                  | >= 100                                                                              | >100                                 | >75         | > 75        | >100          | >75                  |
| Bilirubin (mg/dL)                    | <1.5Xupper limit of normal (ULN) | < 1.5 x ULN or if total bilirubin is > 1.5 x ULN, the direct bilirubin must be normal | < 1.5 ULN or if total bilirubin is > 1.5 x ULN, the direct bilirubin must be normal | <3.5 mg/dL                           | < 1.5 X ULN | < 1.5 X ULN | < 2.0         | < 1.5 x ULN          |
| Creatinine clearance (CrCl) (mL/min) | >40 ml/min                       | >30 ml/min                                                                            | > 30 ml/min                                                                         | >30 ml/min                           | > 40 ml/min | > 50 ml/min | > 50ml/min    | > 40 mL/min          |
| Hemoglobin (g/dL)                    | Not mentioned                    | >7.5                                                                                  | Not mentioned                                                                       | Not mentioned                        | >9          | > 10        | Not mentioned | > 9                  |
